# Supplementary material
Source: publisher figshare collection journal article supplement (https://gsajournals.figshare.com/ndownloader/files/20105258)
Supplement: Supplementary file 1 [file 20105258]

Rab;Background;Mother genotype;Larva;Excess TCs;Misguided TCs;Missing TCs;Unfused DBs;Misfused DBs;;;;;;;;
Negative;btl-gal4,UAS-dsRed, UAS-GFPIR;gal4;1;1;0;0;2;0;;;;;;;;
Negative;btl-gal4,UAS-dsRed, UAS-GFPIR;gal4;2;0;0;0;0;0;;;;;;;;
Negative;btl-gal4,UAS-dsRed, UAS-GFPIR;gal4;3;4;1;0;1;0;;;;;;;;
Negative;btl-gal4,UAS-dsRed, UAS-GFPIR;gal4;4;1;1;1;0;2;;;;;;;;
Negative;btl-gal4,UAS-dsRed, UAS-GFPIR;gal4;5;1;0;0;0;0;;;;;;;;
Negative;btl-gal4,UAS-dsRed, UAS-GFPIR;gal4;6;0;0;0;2;0;;;;;;;;
Negative;btl-gal4,UAS-dsRed, UAS-GFPIR;gal4;7;0;0;0;1;0;;;;;;;;
Negative;btl-gal4,UAS-dsRed, UAS-GFPIR;gal4;8;1;0;0;0;0;;;;;;;;
Negative;btl-gal4,UAS-dsRed, UAS-GFPIR;gal4;9;3;0;0;0;0;;;;;;;;
Negative;btl-gal4,UAS-dsRed, UAS-GFPIR;gal4;10;2;1;0;2;0;;;;;;;;
Negative;btl-gal4,UAS-dsRed, UAS-GFPIR;gal4;11;2;0;0;0;0;;;;;;;;
Negative;btl-gal4,UAS-dsRed, UAS-GFPIR;GFP-IR;1;1;0;0;0;0;;;;;;;;
Negative;btl-gal4,UAS-dsRed, UAS-GFPIR;GFP-IR;2;0;0;0;0;0;;;;;;;;
Negative;btl-gal4,UAS-dsRed, UAS-GFPIR;GFP-IR;3;0;0;0;0;0;;;;;;;;
Negative;btl-gal4,UAS-dsRed, UAS-GFPIR;GFP-IR;4;0;0;0;0;0;;;;;;;;
Negative;btl-gal4,UAS-dsRed, UAS-GFPIR;GFP-IR;5;2;0;0;0;0;;;;;;;;
Negative;btl-gal4,UAS-dsRed, UAS-GFPIR;GFP-IR;6;2;3;1;1;1;;;;;;;;
Negative;btl-gal4,UAS-dsRed, UAS-GFPIR;GFP-IR;7;3;0;0;0;0;;;;;;;;
Negative;btl-gal4,UAS-dsRed, UAS-GFPIR;GFP-IR;8;1;0;0;0;0;;;;;;;;
Negative;btl-gal4,UAS-dsRed, UAS-GFPIR;GFP-IR;9;0;0;0;0;0;;;;;;;;
Negative;btl-gal4,UAS-dsRed, UAS-GFPIR;GFP-IR;10;0;1;0;2;0;;;;;;;;
Negative;btl-gal4,UAS-dsRed, UAS-GFPIR;GFP-IR;11;2;0;1;0;0;;;;;;;;
Negative;btl-gal4,UAS-dsRed, UAS-GFPIR;GFP-IR;12;0;0;0;0;0;;;;;;;;
Negative;btl-gal4,UAS-dsRed, UAS-GFPIR;GFP-IR;13;1;0;1;1;1;;;;;;;;
Negative;btl-gal4,UAS-dsRed, UAS-GFPIR;GFP-IR;14;0;1;0;3;1;;;;;;;;
Negative;btl-gal4,UAS-dsRed, UAS-GFPIR;GFP-IR;15;2;0;1;2;0;;;;;;;;
Negative;btl-gal4,UAS-dsRed, UAS-GFPIR;GFP-IR;16;2;0;0;0;0;;;;;;;;
Negative;btl-gal4,UAS-dsRed, UAS-GFPIR;GFP-IR;17;0;0;0;1;0;;;;;;;;
Negative;btl-gal4,UAS-dsRed, UAS-GFPIR;GFP-IR;18;2;0;0;0;0;;;;;;;;
Negative;btl-gal4,UAS-dsRed, UAS-GFPIR;GFP-IR;19;4;2;1;1;0;;;;;;;;
Negative;btl-gal4,UAS-dsRed, UAS-GFPIR;GFP-IR;20;0;0;0;0;0;;;;;;;;
Negative;btl-gal4,UAS-dsRed, UAS-GFPIR;GFP-IR;21;1;0;0;1;0;;;;;;;;
Negative;btl-gal4,UAS-dsRed, UAS-GFPIR;GFP-IR;22;2;0;0;0;0;;;;;;;;
Negative;btl-gal4,UAS-dsRed, UAS-GFPIR;GFP-IR;23;3;0;0;0;0;;;;;;;;
Negative;btl-gal4,UAS-dsRed, UAS-GFPIR;GFP-IR;24;1;0;0;0;0;;;;;;;;
Negative;btl-gal4,UAS-dsRed, UAS-GFPIR;"GFP-IR/CyO;gal4";1;0;0;0;0;0;;;;;;;;
Negative;btl-gal4,UAS-dsRed, UAS-GFPIR;"GFP-IR/CyO;gal4";2;1;0;0;1;0;;;;;;;;
Negative;btl-gal4,UAS-dsRed, UAS-GFPIR;"GFP-IR/CyO;gal4";3;1;0;0;0;0;;;;;;;;
Negative;btl-gal4,UAS-dsRed, UAS-GFPIR;"GFP-IR/CyO;gal4";4;0;0;0;0;0;;;;;;;;
Negative;btl-gal4,UAS-dsRed, UAS-GFPIR;"GFP-IR/CyO;gal4";5;0;0;0;0;0;;;;;;;;
Negative;btl-gal4,UAS-dsRed, UAS-GFPIR;"GFP-IR/CyO;gal4";6;1;0;0;0;0;;;;;;;;
Negative;btl-gal4,UAS-dsRed, UAS-GFPIR;"GFP-IR/CyO;gal4";7;0;1;0;1;0;;;;;;;;
Negative;btl-gal4,UAS-dsRed, UAS-GFPIR;"GFP-IR/CyO;gal4";8;0;0;0;1;0;;;;;;;;
Negative;btl-gal4,UAS-dsRed, UAS-GFPIR;"GFP-IR/CyO;gal4";9;0;0;0;1;0;;;;;;;;
Negative;btl-gal4,UAS-dsRed, UAS-GFPIR;"GFP-IR/CyO;gal4";10;0;0;0;1;0;;;;;;;;
Negative;btl-gal4,UAS-dsRed, UAS-GFPIR;"GFP-IR/CyO;gal4";11;0;0;0;0;0;;;;;;;;
Negative;btl-gal4,UAS-dsRed, UAS-GFPIR;"GFP-IR/CyO;gal4";12;1;0;0;0;0;;;;;;;;
Negative;TM6,UAS-GFP-IR;gal4;1;0;0;0;2;1;;;;;;;;
Negative;TM6,UAS-GFP-IR;gal4;2;0;0;1;1;0;;;;;;;;
Negative;TM6,UAS-GFP-IR;gal4;3;1;0;3;0;0;;;;;;;;
Negative;TM6,UAS-GFP-IR;gal4;4;1;2;0;4;1;;;;;;;;
Rab01;btl-gal4,UAS-dsRed, UAS-GFPIR;"YRab/YRab;GFP-IR";1;2;0;0;0;0;;;;;;;;
Rab01;btl-gal4,UAS-dsRed, UAS-GFPIR;"YRab/YRab;GFP-IR";2;2;0;0;0;0;;;;;;;;
Rab01;btl-gal4,UAS-dsRed, UAS-GFPIR;"YRab/YRab;GFP-IR";3;2;0;1;0;0;;;;;;;;
Rab01;btl-gal4,UAS-dsRed, UAS-GFPIR;"YRab/YRab;GFP-IR";4;1;0;0;0;0;;;;;;;;
Rab01;btl-gal4,UAS-dsRed, UAS-GFPIR;"YRab/YRab;GFP-IR";5;1;1;0;0;0;;;;;;;;
Rab01;btl-gal4,UAS-dsRed, UAS-GFPIR;"YRab/YRab;GFP-IR";6;1;0;0;0;0;;;;;;;;
Rab01;btl-gal4,UAS-dsRed, UAS-GFPIR;"YRab/YRab;GFP-IR";7;1;0;3;0;0;;;;;;;;
Rab01;btl-gal4,UAS-dsRed, UAS-GFPIR;"YRab/YRab;GFP-IR";8;0;0;0;0;0;;;;;;;;
Rab01;btl-gal4,UAS-dsRed, UAS-GFPIR;"YRab/YRab;GFP-IR";9;0;0;0;0;0;;;;;;;;
Rab01;btl-gal4,UAS-dsRed, UAS-GFPIR;"YRab/YRab;GFP-IR";10;1;0;0;0;0;;;;;;;;
Rab01;btl-gal4,UAS-dsRed, UAS-GFPIR;"YRab/YRab;GFP-IR";11;1;0;0;1;0;;;;;;;;
Rab01;btl-gal4,UAS-dsRed, UAS-GFPIR;"YRab/YRab;GFP-IR";12;3;0;1;0;0;;;;;;;;
Rab01;btl-gal4,UAS-dsRed, UAS-GFPIR;"YRab/YRab;GFP-IR";13;3;1;1;0;0;;;;;;;;
Rab01;btl-gal4,UAS-dsRed, UAS-GFPIR;"YRab/YRab;GFP-IR";14;2;0;0;0;0;;;;;;;;
Rab01;btl-gal4,UAS-dsRed, UAS-GFPIR;"YRab/YRab;GFP-IR";15;0;1;0;0;0;;;;;;;;
Rab01;btl-gal4,UAS-dsRed, UAS-GFPIR;"YRab/YRab;GFP-IR";16;1;0;0;0;0;;;;;;;;
Rab01;btl-gal4,UAS-dsRed, UAS-GFPIR;"YRab/YRab;GFP-IR";17;1;0;0;0;0;;;;;;;;
Rab01;btl-gal4,UAS-dsRed, UAS-GFPIR;"YRab/YRab;GFP-IR";18;7;2;0;1;0;;;;;;;;
Rab01;btl-gal4,UAS-dsRed, UAS-GFPIR;"YRab/YRab;GFP-IR";19;0;0;1;0;0;;;;;;;;
Rab02;btl-gal4,UAS-dsRed, UAS-GFPIR;"YRab/+;gal4";1;2;0;1;0;1;;;;;;;;
Rab02;btl-gal4,UAS-dsRed, UAS-GFPIR;"YRab/+;gal4";2;1;0;0;0;0;;;;;;;;
Rab02;btl-gal4,UAS-dsRed, UAS-GFPIR;"YRab/+;gal4";3;0;0;1;0;0;;;;;;;;
Rab02;btl-gal4,UAS-dsRed, UAS-GFPIR;"YRab/+;gal4";4;0;1;0;4;1;;;;;;;;
Rab02;btl-gal4,UAS-dsRed, UAS-GFPIR;"YRab/+;gal4";5;0;0;0;1;0;;;;;;;;
Rab02;btl-gal4,UAS-dsRed, UAS-GFPIR;"YRab/+;gal4";6;1;0;0;2;0;;;;;;;;
Rab02;btl-gal4,UAS-dsRed, UAS-GFPIR;"YRab/+;gal4";7;0;0;0;0;0;;;;;;;;
Rab02;btl-gal4,UAS-dsRed, UAS-GFPIR;"YRab/+;GFP-IR";1;1;0;0;1;0;;;;;;;;
Rab02;btl-gal4,UAS-dsRed, UAS-GFPIR;"YRab/+;GFP-IR";2;3;0;0;0;0;;;;;;;;
Rab02;btl-gal4,UAS-dsRed, UAS-GFPIR;"YRab/+;GFP-IR";3;4;0;0;1;0;;;;;;;;
Rab02;btl-gal4,UAS-dsRed, UAS-GFPIR;"YRab/+;GFP-IR";4;1;0;1;0;0;;;;;;;;
Rab02;btl-gal4,UAS-dsRed, UAS-GFPIR;"YRab/+;GFP-IR";5;0;0;0;1;0;;;;;;;;
Rab03;btl-gal4,UAS-dsRed, UAS-GFPIR;"YRab/YRab;GFP-IR";1;0;0;0;1;0;;;;;;;;
Rab03;btl-gal4,UAS-dsRed, UAS-GFPIR;"YRab/YRab;GFP-IR";2;0;0;0;0;0;;;;;;;;
Rab03;btl-gal4,UAS-dsRed, UAS-GFPIR;"YRab/YRab;GFP-IR";3;0;0;1;1;0;;;;;;;;
Rab03;btl-gal4,UAS-dsRed, UAS-GFPIR;"YRab/YRab;GFP-IR";4;0;0;0;1;0;;;;;;;;
Rab03;btl-gal4,UAS-dsRed, UAS-GFPIR;"YRab/YRab;GFP-IR";5;1;0;0;1;0;;;;;;;;
Rab03;btl-gal4,UAS-dsRed, UAS-GFPIR;"YRab/YRab;GFP-IR";6;0;0;0;1;0;;;;;;;;
Rab03;btl-gal4,UAS-dsRed, UAS-GFPIR;"YRab/YRab;GFP-IR";7;1;0;0;0;0;;;;;;;;
Rab03;btl-gal4,UAS-dsRed, UAS-GFPIR;"YRab/YRab;GFP-IR";8;0;0;0;0;0;;;;;;;;
Rab03;btl-gal4,UAS-dsRed, UAS-GFPIR;"YRab/YRab;GFP-IR";9;0;0;0;0;0;;;;;;;;
Rab03;btl-gal4,UAS-dsRed, UAS-GFPIR;"YRab/YRab;GFP-IR";10;3;0;0;1;1;;;;;;;;
Rab03;btl-gal4,UAS-dsRed, UAS-GFPIR;"YRab/YRab;GFP-IR";11;0;0;3;0;0;;;;;;;;
Rab03;btl-gal4,UAS-dsRed, UAS-GFPIR;"YRab/YRab;GFP-IR";12;2;1;0;0;0;;;;;;;;
Rab04;btl-gal4,UAS-dsRed, UAS-GFPIR;"YRab/YRab;gal4";1;5;0;0;2;0;;;;;;;;
Rab04;btl-gal4,UAS-dsRed, UAS-GFPIR;"YRab/YRab;gal4";2;2;0;0;0;0;;;;;;;;
Rab04;btl-gal4,UAS-dsRed, UAS-GFPIR;"YRab/YRab;gal4";3;2;0;2;0;0;;;;;;;;
Rab04;btl-gal4,UAS-dsRed, UAS-GFPIR;"YRab/YRab;gal4";4;2;0;0;0;0;;;;;;;;
Rab04;btl-gal4,UAS-dsRed, UAS-GFPIR;"YRab/YRab;gal4";5;2;0;0;2;1;;;;;;;;
Rab04;btl-gal4,UAS-dsRed, UAS-GFPIR;"YRab/YRab;gal4";6;0;1;0;4;2;;;;;;;;
Rab04;btl-gal4,UAS-dsRed, UAS-GFPIR;"YRab/YRab;gal4";7;2;0;1;1;0;;;;;;;;
Rab06;btl-gal4,UAS-dsRed, UAS-GFPIR;"YRab/+;GFP-IR";1;0;0;0;1;1;;;;;;;;
Rab06;btl-gal4,UAS-dsRed, UAS-GFPIR;"YRab/+;GFP-IR";2;0;0;0;0;0;;;;;;;;
Rab06;btl-gal4,UAS-dsRed, UAS-GFPIR;"YRab/+;GFP-IR";3;0;1;0;1;0;;;;;;;;
Rab06;btl-gal4,UAS-dsRed, UAS-GFPIR;"YRab/+;GFP-IR";4;0;0;0;0;0;;;;;;;;
Rab06;btl-gal4,UAS-dsRed, UAS-GFPIR;"YRab/+;GFP-IR";5;0;0;0;0;0;;;;;;;;
Rab06;btl-gal4,UAS-dsRed, UAS-GFPIR;"YRab/+;GFP-IR";6;0;0;0;0;0;;;;;;;;
Rab06;btl-gal4,UAS-dsRed, UAS-GFPIR;"YRab/+;GFP-IR";7;1;0;0;0;0;;;;;;;;
Rab06;btl-gal4,UAS-dsRed, UAS-GFPIR;"YRab/+;GFP-IR";8;0;0;0;0;0;;;;;;;;
Rab06;btl-gal4,UAS-dsRed, UAS-GFPIR;"YRab/+;GFP-IR";9;1;0;0;0;0;;;;;;;;
Rab07;btl-gal4,UAS-dsRed, UAS-GFPIR;"YRab/YRab;GFP-IR";1;4;1;1;3;1;;;;;;;;
Rab07;btl-gal4,UAS-dsRed, UAS-GFPIR;"YRab/YRab;GFP-IR";2;4;0;0;3;0;;;;;;;;
Rab07;btl-gal4,UAS-dsRed, UAS-GFPIR;"YRab/YRab;GFP-IR";3;1;1;0;4;0;;;;;;;;
Rab07;btl-gal4,UAS-dsRed, UAS-GFPIR;"YRab/YRab;GFP-IR";4;5;0;0;0;0;;;;;;;;
Rab07;btl-gal4,UAS-dsRed, UAS-GFPIR;"YRab/YRab;GFP-IR";5;0;1;2;5;1;;;;;;;;
Rab07;btl-gal4,UAS-dsRed, UAS-GFPIR;"YRab/YRab;GFP-IR";6;1;0;1;2;1;;;;;;;;
Rab07;btl-gal4,UAS-dsRed, UAS-GFPIR;"YRab/YRab;GFP-IR";7;1;1;1;2;0;;;;;;;;
Rab07;btl-gal4,UAS-dsRed, UAS-GFPIR;"YRab/YRab;GFP-IR";8;3;3;1;4;3;;;;;;;;
Rab08;btl-gal4, UAS-GFPIR;"YRab/+;gal4";1;2;0;0;1;0;;;;;;;;
Rab08;btl-gal4, UAS-GFPIR;"YRab/+;gal4";2;1;0;1;0;0;;;;;;;;
Rab08;btl-gal4, UAS-GFPIR;"YRab/+;gal4";3;0;0;0;1;0;;;;;;;;
Rab08;btl-gal4, UAS-GFPIR;"YRab/+;gal4";4;1;0;0;0;0;;;;;;;;
Rab08;btl-gal4, UAS-GFPIR;"YRab/+;GFP-IR";1;0;0;0;2;1;;;;;;;;
Rab08;btl-gal4, UAS-GFPIR;"YRab/+;GFP-IR";2;0;2;1;3;2;;;;;;;;
Rab08;btl-gal4, UAS-GFPIR;"YRab/+;GFP-IR";3;0;0;0;1;0;;;;;;;;
Rab08;btl-gal4, UAS-GFPIR;"YRab/+;GFP-IR";4;0;0;0;0;0;;;;;;;;
Rab08;btl-gal4, UAS-GFPIR;"YRab/+;GFP-IR";5;0;0;0;0;0;;;;;;;;
Rab08;btl-gal4, UAS-GFPIR;"YRab/+;GFP-IR";6;0;0;0;0;0;;;;;;;;
Rab08;btl-gal4, UAS-GFPIR;"YRab/+;GFP-IR";7;0;0;1;0;0;;;;;;;;
Rab08;btl-gal4, UAS-GFPIR;"YRab/+;GFP-IR";8;0;0;0;0;0;;;;;;;;
Rab08;btl-gal4, UAS-GFPIR;"YRab/+;GFP-IR";9;0;0;1;0;0;;;;;;;;
Rab09;btl-gal4, UAS-GFPIR;"YRab/YRab;gal4";1;3;0;0;0;0;;;;;;;;
Rab09;btl-gal4, UAS-GFPIR;"YRab/YRab;gal4";2;1;0;0;0;0;;;;;;;;
Rab09;btl-gal4, UAS-GFPIR;"YRab/YRab;gal4";3;0;0;1;0;0;;;;;;;;
Rab09;btl-gal4, UAS-GFPIR;"YRab/YRab;gal4";4;0;0;0;0;0;;;;;;;;
Rab09;btl-gal4, UAS-GFPIR;"YRab/YRab;gal4";5;1;0;0;0;0;;;;;;;;
Rab09;btl-gal4, UAS-GFPIR;"YRab/YRab;gal4";6;1;1;1;2;1;;;;;;;;
Rab10;btl-gal4,UAS-dsRed, UAS-GFPIR;"Yrab/+;gal4";1;0;0;0;0;0;;;;;;;;
Rab10;btl-gal4,UAS-dsRed, UAS-GFPIR;"Yrab/+;gal4";2;0;0;1;0;0;;;;;;;;
Rab10;btl-gal4,UAS-dsRed, UAS-GFPIR;"Yrab/+;gal4";3;0;0;0;0;0;;;;;;;;
Rab10;btl-gal4,UAS-dsRed, UAS-GFPIR;"Yrab/+;gal4";4;0;0;0;0;0;;;;;;;;
Rab10;btl-gal4,UAS-dsRed, UAS-GFPIR;"Yrab/+;gal4";5;0;0;0;0;0;;;;;;;;
Rab10;btl-gal4,UAS-dsRed, UAS-GFPIR;"Yrab/+;gal4";6;0;0;0;0;0;;;;;;;;
Rab11;btl-gal4,UAS-dsRed, UAS-GFPIR;"YRab/YRab;GFP-IR";1;4;1;0;0;0;;;;;;;;
Rab11;btl-gal4,UAS-dsRed, UAS-GFPIR;"YRab/YRab;GFP-IR";2;1;1;0;0;0;;;;;;;;
Rab11;btl-gal4,UAS-dsRed, UAS-GFPIR;"YRab/YRab;GFP-IR";3;0;1;1;2;2;;;;;;;;
Rab11;btl-gal4,UAS-dsRed, UAS-GFPIR;"YRab/YRab;GFP-IR";4;2;0;0;0;0;;;;;;;;
Rab11;btl-gal4,UAS-dsRed, UAS-GFPIR;"YRab/YRab;GFP-IR";5;3;1;0;2;1;;;;;;;;
Rab11;btl-gal4,UAS-dsRed, UAS-GFPIR;"YRab/YRab;GFP-IR";6;3;0;0;0;0;;;;;;;;
Rab11;btl-gal4,UAS-dsRed, UAS-GFPIR;"YRab/YRab;GFP-IR";7;3;0;1;1;0;;;;;;;;
Rab11;btl-gal4,UAS-dsRed, UAS-GFPIR;"YRab/YRab;GFP-IR";8;2;0;0;1;0;;;;;;;;
Rab11;btl-gal4,UAS-dsRed, UAS-GFPIR;"YRab/YRab;GFP-IR";9;3;1;0;1;0;;;;;;;;
Rab11;btl-gal4,UAS-dsRed, UAS-GFPIR;"YRab/YRab;GFP-IR";10;3;0;0;0;0;;;;;;;;
Rab11;btl-gal4,UAS-dsRed, UAS-GFPIR;"YRab/YRab;GFP-IR";11;6;0;1;2;0;;;;;;;;
Rab11;btl-gal4,UAS-dsRed, UAS-GFPIR;"YRab/YRab;GFP-IR";12;2;0;0;0;0;;;;;;;;
Rab11;btl-gal4,UAS-dsRed, UAS-GFPIR;"YRab/YRab;GFP-IR";13;1;1;0;1;0;;;;;;;;
Rab11;btl-gal4,UAS-dsRed, UAS-GFPIR;"YRab/YRab;GFP-IR";14;1;0;0;0;0;;;;;;;;
Rab11;btl-gal4,UAS-dsRed, UAS-GFPIR;"YRab/YRab;GFP-IR";15;2;0;0;1;0;;;;;;;;
Rab11;btl-gal4,UAS-dsRed, UAS-GFPIR;"YRab/YRab;GFP-IR";16;3;0;0;0;0;;;;;;;;
Rab11;btl-gal4,UAS-dsRed, UAS-GFPIR;"YRab/YRab;GFP-IR";17;0;0;0;0;0;;;;;;;;
Rab11;btl-gal4,UAS-dsRed, UAS-GFPIR;"YRab/YRab;GFP-IR";18;2;0;0;1;1;;;;;;;;
Rab11;btl-gal4,UAS-dsRed, UAS-GFPIR;"YRab/YRab;GFP-IR";19;2;0;0;1;0;;;;;;;;
Rab11;btl-gal4,UAS-dsRed, UAS-GFPIR;"YRab/YRab;GFP-IR";20;0;0;0;0;0;;;;;;;;
Rab11;btl-gal4,UAS-dsRed, UAS-GFPIR;"YRab/YRab;GFP-IR";21;1;3;0;0;0;;;;;;;;
Rab14;btl-gal4,UAS-dsRed, UAS-GFPIR;"YRab/YRab;GFP-IR";1;0;0;0;0;0;;;;;;;;
Rab14;btl-gal4,UAS-dsRed, UAS-GFPIR;"YRab/YRab;GFP-IR";2;3;1;0;0;0;;;;;;;;
Rab14;btl-gal4,UAS-dsRed, UAS-GFPIR;"YRab/YRab;GFP-IR";3;5;0;0;0;0;;;;;;;;
Rab14;btl-gal4,UAS-dsRed, UAS-GFPIR;"YRab/YRab;GFP-IR";4;1;0;0;0;0;;;;;;;;
Rab14;btl-gal4,UAS-dsRed, UAS-GFPIR;"YRab/YRab;GFP-IR";5;5;0;0;1;0;;;;;;;;
Rab14;btl-gal4,UAS-dsRed, UAS-GFPIR;"YRab/YRab;GFP-IR";6;3;0;1;0;0;;;;;;;;
Rab14;btl-gal4,UAS-dsRed, UAS-GFPIR;"YRab/YRab;GFP-IR";7;0;0;0;0;0;;;;;;;;
Rab14;btl-gal4,UAS-dsRed, UAS-GFPIR;"YRab/YRab;GFP-IR";8;0;0;0;0;0;;;;;;;;
Rab14;btl-gal4,UAS-dsRed, UAS-GFPIR;"YRab/YRab;GFP-IR";9;3;1;0;3;1;;;;;;;;
Rab14;btl-gal4,UAS-dsRed, UAS-GFPIR;"YRab/YRab;GFP-IR";10;5;0;0;0;0;;;;;;;;
Rab14;btl-gal4,UAS-dsRed, UAS-GFPIR;"YRab/YRab;GFP-IR";11;2;0;0;0;0;;;;;;;;
Rab14;btl-gal4,UAS-dsRed, UAS-GFPIR;"YRab/YRab;GFP-IR";12;0;0;0;0;0;;;;;;;;
Rab18;btl-gal4,UAS-dsRed, UAS-GFPIR;"YRab/YRab;GFP-IR";1;3;0;0;0;0;;;;;;;;
Rab18;btl-gal4,UAS-dsRed, UAS-GFPIR;"YRab/YRab;GFP-IR";2;3;0;0;0;0;;;;;;;;
Rab18;btl-gal4,UAS-dsRed, UAS-GFPIR;"YRab/YRab;GFP-IR";3;0;0;0;1;1;;;;;;;;
Rab18;btl-gal4,UAS-dsRed, UAS-GFPIR;"YRab/YRab;GFP-IR";4;0;0;2;1;0;;;;;;;;
Rab18;btl-gal4,UAS-dsRed, UAS-GFPIR;"YRab/YRab;GFP-IR";5;0;0;0;0;0;;;;;;;;
Rab18;btl-gal4,UAS-dsRed, UAS-GFPIR;"YRab/YRab;GFP-IR";6;1;1;0;0;0;;;;;;;;
Rab18;btl-gal4,UAS-dsRed, UAS-GFPIR;"YRab/YRab;GFP-IR";7;4;1;0;1;0;;;;;;;;
Rab18;btl-gal4,UAS-dsRed, UAS-GFPIR;"YRab/YRab;GFP-IR";8;2;1;2;0;0;;;;;;;;
Rab18;btl-gal4,UAS-dsRed, UAS-GFPIR;"YRab/YRab;GFP-IR";9;2;0;0;0;0;;;;;;;;
Rab18;btl-gal4,UAS-dsRed, UAS-GFPIR;"YRab/YRab;GFP-IR";10;2;0;0;1;0;;;;;;;;
Rab18;btl-gal4,UAS-dsRed, UAS-GFPIR;"YRab/YRab;GFP-IR";11;0;0;0;0;0;;;;;;;;
Rab18;btl-gal4,UAS-dsRed, UAS-GFPIR;"YRab/YRab;GFP-IR";12;0;0;1;1;0;;;;;;;;
Rab18;btl-gal4,UAS-dsRed, UAS-GFPIR;"YRab/YRab;GFP-IR";13;2;1;0;1;0;;;;;;;;
Rab18;btl-gal4,UAS-dsRed, UAS-GFPIR;"YRab/YRab;GFP-IR";14;3;0;0;2;1;;;;;;;;
Rab19;btl-gal4,UAS-dsRed, UAS-GFPIR;"YRab/YRab;GFP-IR";1;7;2;0;4;2;;;;;;;;
Rab19;btl-gal4,UAS-dsRed, UAS-GFPIR;"YRab/YRab;GFP-IR";2;7;1;0;5;2;;;;;;;;
Rab19;btl-gal4,UAS-dsRed, UAS-GFPIR;"YRab/YRab;GFP-IR";3;3;0;0;0;0;;;;;;;;
Rab19;btl-gal4,UAS-dsRed, UAS-GFPIR;"YRab/YRab;GFP-IR";4;8;3;0;4;0;;;;;;;;
Rab19;btl-gal4,UAS-dsRed, UAS-GFPIR;"YRab/YRab;GFP-IR";5;8;2;1;2;1;;;;;;;;
Rab19;btl-gal4,UAS-dsRed, UAS-GFPIR;"YRab/YRab;GFP-IR";6;10;1;0;2;0;;;;;;;;
Rab19;btl-gal4,UAS-dsRed, UAS-GFPIR;"YRab/YRab;GFP-IR";7;8;2;1;5;2;;;;;;;;
Rab19;btl-gal4,UAS-dsRed, UAS-GFPIR;"YRab/YRab;GFP-IR";8;2;1;0;2;0;;;;;;;;
Rab19;btl-gal4,UAS-dsRed, UAS-GFPIR;"YRab/YRab;GFP-IR";9;7;4;0;0;0;;;;;;;;
Rab19;btl-gal4,UAS-dsRed, UAS-GFPIR;"YRab/YRab;GFP-IR";10;5;2;0;2;1;;;;;;;;
Rab19;btl-gal4,UAS-dsRed, UAS-GFPIR;"YRab/YRab;GFP-IR";11;8;1;1;3;0;;;;;;;;
Rab19;btl-gal4,UAS-dsRed, UAS-GFPIR;"YRab/YRab;GFP-IR";12;9;2;0;3;1;;;;;;;;
Rab19;btl-gal4,UAS-dsRed, UAS-GFPIR;"YRab/YRab;GFP-IR";13;3;3;1;4;2;;;;;;;;
Rab21;btl-gal4,UAS-dsRed, UAS-GFPIR;"YRab/YRab;gal4";1;0;1;4;3;1;;;;;;;;
Rab21;btl-gal4,UAS-dsRed, UAS-GFPIR;"YRab/YRab;gal4";2;0;0;1;1;1;;;;;;;;
Rab21;btl-gal4,UAS-dsRed, UAS-GFPIR;"YRab/YRab;gal4";3;1;0;0;0;0;;;;;;;;
Rab21;btl-gal4,UAS-dsRed, UAS-GFPIR;"YRab/YRab;gal4";4;3;0;0;1;0;;;;;;;;
Rab21;btl-gal4,UAS-dsRed, UAS-GFPIR;"YRab/YRab;gal4";5;1;0;0;3;1;;;;;;;;
Rab21;btl-gal4,UAS-dsRed, UAS-GFPIR;"YRab/YRab;gal4";6;2;0;0;2;0;;;;;;;;
Rab21;btl-gal4,UAS-dsRed, UAS-GFPIR;"YRab/YRab;gal4";7;0;0;1;0;0;;;;;;;;
Rab21;btl-gal4,UAS-dsRed, UAS-GFPIR?;"YRab/YRab;gal4";8;0;0;0;2;0;;;;;;;;
Rab21;btl-gal4,UAS-dsRed, UAS-GFPIR?;"YRab/YRab;gal4";9;0;0;0;1;0;;;;;;;;
Rab21;btl-gal4,UAS-dsRed, UAS-GFPIR?;"YRab/YRab;gal4";10;1;0;0;0;0;;;;;;;;
Rab21;btl-gal4,UAS-dsRed, UAS-GFPIR?;"YRab/YRab;gal4";11;1;0;0;0;0;;;;;;;;
Rab21;btl-gal4,UAS-dsRed, UAS-GFPIR?;"YRab/YRab;gal4";12;0;0;0;0;0;;;;;;;;
Rab21;btl-gal4,UAS-dsRed, UAS-GFPIR?;"YRab/YRab;gal4";13;1;0;0;1;0;;;;;;;;
Rab21;btl-gal4,UAS-dsRed, UAS-GFPIR?;"YRab/YRab;gal4";14;0;0;0;1;0;;;;;;;;
Rab21;btl-gal4,UAS-dsRed, UAS-GFPIR?;"YRab/YRab;gal4";15;0;0;0;0;0;;;;;;;;
Rab21;btl-gal4,UAS-dsRed, UAS-GFPIR?;"YRab/YRab;gal4";16;0;0;1;4;2;;;;;;;;
Rab23;btl-gal4, UAS-GFPIR;"YRab/YRab;GFP-IR";1;3;0;0;3;1;;;;;;;;
Rab23;btl-gal4, UAS-GFPIR;"YRab/YRab;GFP-IR";2;2;0;0;0;0;;;;;;;;
Rab23;btl-gal4, UAS-GFPIR;"YRab/YRab;GFP-IR";3;6;0;0;0;0;;;;;;;;
Rab23;btl-gal4, UAS-GFPIR;"YRab/YRab;GFP-IR";4;2;0;1;1;1;;;;;;;;
Rab23;btl-gal4, UAS-GFPIR;"YRab/YRab;GFP-IR";5;2;1;1;0;0;;;;;;;;
Rab23;btl-gal4, UAS-GFPIR;"YRab/YRab;GFP-IR";6;2;0;0;0;0;;;;;;;;
Rab23;btl-gal4, UAS-GFPIR;"YRab/YRab;GFP-IR";7;1;0;0;0;0;;;;;;;;
Rab23;btl-gal4, UAS-GFPIR;"YRab/YRab;GFP-IR";8;0;0;1;1;0;;;;;;;;
Rab23;btl-gal4, UAS-GFPIR;"YRab/YRab;GFP-IR";9;4;0;0;0;0;;;;;;;;
Rab23;btl-gal4, UAS-GFPIR;"YRab/YRab;GFP-IR";10;6;0;0;0;0;;;;;;;;
Rab23;btl-gal4, UAS-GFPIR;"YRab/YRab;GFP-IR";11;1;0;1;0;0;;;;;;;;
Rab23;btl-gal4, UAS-GFPIR;"YRab/YRab;GFP-IR";12;4;1;0;2;1;;;;;;;;
Rab23;btl-gal4, UAS-GFPIR;"YRab/YRab;GFP-IR";13;0;0;0;1;0;;;;;;;;
Rab26;btl-gal4, UAS-GFPIR;"YRab/YRab;GFP-IR";1;0;0;0;0;0;;;;;;;;
Rab26;btl-gal4, UAS-GFPIR;"YRab/YRab;GFP-IR";2;0;0;0;1;0;;;;;;;;
Rab26;btl-gal4, UAS-GFPIR;"YRab/YRab;GFP-IR";3;5;1;0;0;0;;;;;;;;
Rab26;btl-gal4, UAS-GFPIR;"YRab/YRab;GFP-IR";4;3;0;0;0;0;;;;;;;;
Rab26;btl-gal4, UAS-GFPIR;"YRab/YRab;GFP-IR";5;2;0;0;0;0;;;;;;;;
Rab26;btl-gal4, UAS-GFPIR;"YRab/YRab;GFP-IR";6;3;1;1;1;0;;;;;;;;
Rab26;btl-gal4, UAS-GFPIR;"YRab/YRab;GFP-IR";7;6;0;0;0;0;;;;;;;;
Rab26;btl-gal4, UAS-GFPIR;"YRab/YRab;GFP-IR";8;3;0;1;1;0;;;;;;;;
Rab27;btl-gal4,UAS-dsRed, UAS-GFPIR;"YRab/YRab;gal4";1;1;0;0;3;2;;;;;;;;
Rab27;btl-gal4,UAS-dsRed, UAS-GFPIR;"YRab/YRab;gal4";2;1;1;0;0;0;;;;;;;;
Rab27;btl-gal4,UAS-dsRed, UAS-GFPIR;"YRab/YRab;gal4";3;0;1;0;2;2;;;;;;;;
Rab27;btl-gal4,UAS-dsRed, UAS-GFPIR;"YRab/YRab;gal4";4;0;0;0;0;0;;;;;;;;
Rab27;btl-gal4,UAS-dsRed, UAS-GFPIR;"YRab/YRab;gal4";5;0;0;3;3;1;;;;;;;;
Rab27;btl-gal4,UAS-dsRed, UAS-GFPIR;"YRab/YRab;gal4";6;0;0;0;2;1;;;;;;;;
Rab27;btl-gal4,UAS-dsRed, UAS-GFPIR;"YRab/YRab;gal4";7;0;0;0;2;1;;;;;;;;
Rab30;btl-gal4,UAS-dsRed, UAS-GFPIR;"YRab/YRab;gal4";1;0;0;1;0;0;;;;;;;;
Rab30;btl-gal4,UAS-dsRed, UAS-GFPIR;"YRab/YRab;gal4";2;1;0;0;0;0;;;;;;;;
Rab30;btl-gal4,UAS-dsRed, UAS-GFPIR;"YRab/YRab;gal4";3;1;0;0;2;1;;;;;;;;
Rab30;btl-gal4,UAS-dsRed, UAS-GFPIR;"YRab/YRab;gal4";4;1;0;0;1;0;;;;;;;;
Rab30;btl-gal4,UAS-dsRed, UAS-GFPIR;"YRab/YRab;gal4";5;0;0;0;3;0;;;;;;;;
Rab30;btl-gal4,UAS-dsRed, UAS-GFPIR;"YRab/YRab;gal4";6;0;0;0;1;0;;;;;;;;
Rab30;btl-gal4,UAS-dsRed, UAS-GFPIR;"YRab/YRab;gal4";7;0;0;0;0;0;;;;;;;;
Rab30;btl-gal4,UAS-dsRed, UAS-GFPIR;"YRab/YRab;GFP-IR";1;1;0;0;0;0;;;;;;;;
Rab30;btl-gal4,UAS-dsRed, UAS-GFPIR;"YRab/YRab;GFP-IR";2;3;0;0;0;0;;;;;;;;
Rab30;btl-gal4,UAS-dsRed, UAS-GFPIR;"YRab/YRab;GFP-IR";3;2;2;0;0;0;;;;;;;;
Rab30;btl-gal4,UAS-dsRed, UAS-GFPIR;"YRab/YRab;GFP-IR";4;1;0;0;0;0;;;;;;;;
Rab30;btl-gal4,UAS-dsRed, UAS-GFPIR;"YRab/YRab;GFP-IR";5;2;0;0;1;0;;;;;;;;
Rab32;btl-gal4,UAS-dsRed, UAS-GFPIR;"YRab/YRab;GFP-IR";1;2;1;0;2;0;;;;;;;;
Rab32;btl-gal4,UAS-dsRed, UAS-GFPIR;"YRab/YRab;GFP-IR";2;0;0;0;1;1;;;;;;;;
Rab32;btl-gal4,UAS-dsRed, UAS-GFPIR;"YRab/YRab;GFP-IR";3;2;0;1;0;0;;;;;;;;
Rab32;btl-gal4,UAS-dsRed, UAS-GFPIR;"YRab/YRab;GFP-IR";4;2;6;0;6;1;;;;;;;;
Rab32;btl-gal4,UAS-dsRed, UAS-GFPIR;"YRab/YRab;GFP-IR";5;3;1;0;2;0;;;;;;;;
Rab32;btl-gal4,UAS-dsRed, UAS-GFPIR;"YRab/YRab;GFP-IR";6;2;1;0;2;0;;;;;;;;
Rab32;btl-gal4,UAS-dsRed, UAS-GFPIR;"YRab/YRab;GFP-IR";7;2;1;0;1;0;;;;;;;;
Rab32;btl-gal4,UAS-dsRed, UAS-GFPIR;"YRab/YRab;GFP-IR";8;3;2;1;0;0;;;;;;;;
Rab32;btl-gal4,UAS-dsRed, UAS-GFPIR;"YRab/YRab;GFP-IR";9;3;2;1;2;0;;;;;;;;
Rab32;btl-gal4,UAS-dsRed, UAS-GFPIR;"YRab/YRab;GFP-IR";10;6;2;0;1;0;;;;;;;;
Rab32;btl-gal4,UAS-dsRed, UAS-GFPIR;"YRab/YRab;GFP-IR";11;2;0;0;2;0;;;;;;;;
Rab32;btl-gal4,UAS-dsRed, UAS-GFPIR;"YRab/YRab;GFP-IR";12;5;0;0;0;0;;;;;;;;
Rab32;btl-gal4,UAS-dsRed, UAS-GFPIR;"YRab/YRab;GFP-IR";13;4;1;0;1;0;;;;;;;;
Rab32;btl-gal4,UAS-dsRed, UAS-GFPIR;"YRab/YRab;GFP-IR";14;2;0;2;0;0;;;;;;;;
Rab32;btl-gal4,UAS-dsRed, UAS-GFPIR;"YRab/YRab;GFP-IR";15;1;2;0;4;1;;;;;;;;
Rab32;btl-gal4,UAS-dsRed, UAS-GFPIR;"YRab/YRab;GFP-IR";16;3;1;2;5;1;;;;;;;;
Rab35;btl-gal4,UAS-dsRed, UAS-GFPIR?;"YRab/YRab;gal4";1;1;1;0;4;0;;;;;;;;
Rab35;btl-gal4,UAS-dsRed, UAS-GFPIR?;"YRab/YRab;gal4";2;0;0;0;2;0;;;;;;;;
Rab35;btl-gal4,UAS-dsRed, UAS-GFPIR?;"YRab/YRab;gal4";3;4;0;0;3;0;;;;;;;;
Rab35;btl-gal4,UAS-dsRed, UAS-GFPIR?;"YRab/YRab;gal4";4;2;0;0;2;0;;;;;;;;
Rab35;btl-gal4,UAS-dsRed, UAS-GFPIR?;"YRab/YRab;gal4";5;2;0;0;3;0;;;;;;;;
Rab35;btl-gal4,UAS-dsRed, UAS-GFPIR?;"YRab/YRab;gal4";6;1;0;0;3;0;;;;;;;;
Rab35;btl-gal4,UAS-dsRed, UAS-GFPIR;"YRab/YRab;GFP-IR";1;3;0;0;5;0;;;;;;;;
Rab35;btl-gal4,UAS-dsRed, UAS-GFPIR;"YRab/YRab;GFP-IR";2;2;0;0;4;1;;;;;;;;
Rab35;btl-gal4,UAS-dsRed, UAS-GFPIR;"YRab/YRab;GFP-IR";3;3;1;0;5;0;;;;;;;;
Rab35;btl-gal4,UAS-dsRed, UAS-GFPIR;"YRab/YRab;GFP-IR";4;1;0;0;0;0;;;;;;;;
Rab35;btl-gal4,UAS-dsRed, UAS-GFPIR;"YRab/YRab;GFP-IR";5;2;1;1;0;0;;;;;;;;
Rab35;btl-gal4,UAS-dsRed, UAS-GFPIR;"YRab/YRab;GFP-IR";6;1;2;1;4;1;;;;;;;;
Rab35;btl-gal4,UAS-dsRed, UAS-GFPIR;"YRab/YRab;GFP-IR";7;1;1;0;3;1;;;;;;;;
Rab35;btl-gal4,UAS-dsRed, UAS-GFPIR;"YRab/YRab;GFP-IR";8;1;1;0;4;0;;;;;;;;
Rab35;btl-gal4,UAS-dsRed, UAS-GFPIR;"YRab/YRab;GFP-IR";9;3;0;0;0;0;;;;;;;;
Rab35;btl-gal4,UAS-dsRed, UAS-GFPIR;"YRab/YRab;GFP-IR";10;1;0;0;2;0;;;;;;;;
Rab35;btl-gal4,UAS-dsRed, UAS-GFPIR;"YRab/YRab;GFP-IR";11;0;1;0;4;0;;;;;;;;
Rab35;btl-gal4,UAS-dsRed, UAS-GFPIR;"YRab/YRab;GFP-IR";12;1;1;0;0;0;;;;;;;;
Rab39;btl-gal4,UAS-dsRed, UAS-GFPIR;"YRab/YRab;gal4";1;1;0;0;0;0;;;;;;;;
Rab39;btl-gal4,UAS-dsRed, UAS-GFPIR;"YRab/YRab;gal4";2;0;0;0;1;0;;;;;;;;
Rab39;btl-gal4,UAS-dsRed, UAS-GFPIR;"YRab/YRab;gal4";3;0;0;0;1;1;;;;;;;;
Rab39;btl-gal4,UAS-dsRed, UAS-GFPIR;"YRab/YRab;gal4";4;0;0;0;0;0;;;;;;;;
Rab39;btl-gal4,UAS-dsRed, UAS-GFPIR;"YRab/YRab;gal4";5;0;0;0;0;0;;;;;;;;
Rab39;btl-gal4,UAS-dsRed, UAS-GFPIR;"YRab/YRab;gal4";6;0;0;0;1;0;;;;;;;;
Rab39;btl-gal4,UAS-dsRed, UAS-GFPIR;"YRab/YRab;gal4";7;0;0;0;2;2;;;;;;;;
Rab39;btl-gal4,UAS-dsRed, UAS-GFPIR;"YRab/YRab;gal4";8;0;1;1;3;3;;;;;;;;
Rab39;btl-gal4,UAS-dsRed, UAS-GFPIR;"YRab/YRab;gal4";9;1;0;0;2;0;;;;;;;;
Rab39;btl-gal4,UAS-dsRed, UAS-GFPIR;"YRab/YRab;gal4";10;2;0;0;1;0;;;;;;;;
Rab39;btl-gal4,UAS-dsRed, UAS-GFPIR;"YRab/YRab;gal4";11;0;0;0;0;0;;;;;;;;
Rab39;btl-gal4,UAS-dsRed, UAS-GFPIR;"YRab/YRab;gal4";12;0;1;0;1;0;;;;;;;;
Rab39;btl-gal4,UAS-dsRed, UAS-GFPIR;"YRab/YRab;gal4";13;0;0;0;0;0;;;;;;;;
Rab39;btl-gal4,UAS-dsRed, UAS-GFPIR;"YRab/YRab;gal4";14;2;0;0;1;0;;;;;;;;
Rab39;btl-gal4,UAS-dsRed, UAS-GFPIR;"YRab/YRab;gal4";15;1;0;0;5;2;;;;;;;;
Rab39;btl-gal4,UAS-dsRed, UAS-GFPIR;"YRab/YRab;gal4";16;0;1;0;1;0;;;;;;;;
Rab39;btl-gal4,UAS-dsRed, UAS-GFPIR;"YRab/YRab;gal4";17;1;0;0;0;0;;;;;;;;
Rab39;btl-gal4,UAS-dsRed, UAS-GFPIR;"YRab/YRab;GFP-IR";1;1;1;3;2;2;;;;;;;;
Rab39;btl-gal4,UAS-dsRed, UAS-GFPIR;"YRab/YRab;GFP-IR";2;3;0;0;1;0;;;;;;;;
Rab39;btl-gal4,UAS-dsRed, UAS-GFPIR;"YRab/YRab;GFP-IR";3;1;1;0;2;0;;;;;;;;
Rab39;btl-gal4,UAS-dsRed, UAS-GFPIR;"YRab/YRab;GFP-IR";4;0;0;0;5;1;;;;;;;;
Rab39;btl-gal4,UAS-dsRed, UAS-GFPIR;"YRab/YRab;GFP-IR";5;1;4;3;3;0;;;;;;;;
Rab39;btl-gal4,UAS-dsRed, UAS-GFPIR;"YRab/YRab;GFP-IR";6;1;0;0;4;1;;;;;;;;
Rab39;btl-gal4,UAS-dsRed, UAS-GFPIR;"YRab/YRab;GFP-IR";7;0;0;0;1;0;;;;;;;;
Rab39;btl-gal4,UAS-dsRed, UAS-GFPIR;"YRab/YRab;GFP-IR";8;1;0;2;3;1;;;;;;;;
Rab39;btl-gal4,UAS-dsRed, UAS-GFPIR;"YRab/YRab;GFP-IR";9;2;0;0;4;0;;;;;;;;
Rab39;btl-gal4,UAS-dsRed, UAS-GFPIR;"YRab/YRab;GFP-IR";10;1;0;0;1;0;;;;;;;;
Rab39;btl-gal4,UAS-dsRed, UAS-GFPIR;"YRab/YRab;GFP-IR";11;0;0;1;2;0;;;;;;;;
Rab39;btl-gal4,UAS-dsRed, UAS-GFPIR;"YRab/YRab;GFP-IR";12;3;0;0;3;0;;;;;;;;
Rab39;btl-gal4,UAS-dsRed, UAS-GFPIR;"YRab/YRab;GFP-IR";13;2;1;0;1;0;;;;;;;;
Rab40;btl-gal4,UAS-dsRed, UAS-GFPIR;"YRab/YRab;gal4";1;0;0;0;0;0;;;;;;;;
Rab40;btl-gal4,UAS-dsRed, UAS-GFPIR;"YRab/YRab;gal4";2;1;2;5;3;0;;;;;;;;
Rab40;btl-gal4,UAS-dsRed, UAS-GFPIR;"YRab/YRab;gal4";3;1;0;0;2;1;;;;;;;;
Rab40;btl-gal4,UAS-dsRed, UAS-GFPIR;"YRab/YRab;gal4";4;0;0;0;0;2;;;;;;;;
Rab40;btl-gal4,UAS-dsRed, UAS-GFPIR;"YRab/YRab;gal4";5;0;0;0;1;0;;;;;;;;
Rab40;btl-gal4,UAS-dsRed, UAS-GFPIR;"YRab/YRab;gal4";6;0;0;1;1;0;;;;;;;;
Rab40;btl-gal4,UAS-dsRed, UAS-GFPIR;"YRab/YRab;gal4";7;0;0;0;0;0;;;;;;;;
Rab40;btl-gal4,UAS-dsRed, UAS-GFPIR;"YRab/YRab;gal4";8;1;2;0;2;1;;;;;;;;
Rab40;btl-gal4,UAS-dsRed, UAS-GFPIR;"YRab/YRab;GFP-IR";1;1;0;0;0;0;;;;;;;;
Rab40;btl-gal4,UAS-dsRed, UAS-GFPIR;"YRab/YRab;GFP-IR";2;0;0;0;4;1;;;;;;;;
Rab40;btl-gal4,UAS-dsRed, UAS-GFPIR;"YRab/YRab;GFP-IR";3;3;0;0;1;1;;;;;;;;
Rab40;btl-gal4,UAS-dsRed, UAS-GFPIR;"YRab/YRab;GFP-IR";4;2;1;0;0;0;;;;;;;;
Rab40;btl-gal4,UAS-dsRed, UAS-GFPIR;"YRab/YRab;GFP-IR";5;0;0;0;1;1;;;;;;;;
Rab40;btl-gal4,UAS-dsRed, UAS-GFPIR;"YRab/YRab;GFP-IR";6;1;0;0;0;0;;;;;;;;
Rab40;btl-gal4,UAS-dsRed, UAS-GFPIR;"YRab/YRab;GFP-IR";7;1;0;2;1;0;;;;;;;;
Rab40;btl-gal4,UAS-dsRed, UAS-GFPIR;"YRab/YRab;GFP-IR";8;1;0;1;3;2;;;;;;;;
Rab40;btl-gal4,UAS-dsRed, UAS-GFPIR;"YRab/YRab;GFP-IR";9;0;0;1;1;1;;;;;;;;
Rab40;btl-gal4,UAS-dsRed, UAS-GFPIR;"YRab/YRab;GFP-IR";10;1;0;0;1;0;;;;;;;;
Rab40;btl-gal4,UAS-dsRed, UAS-GFPIR;"YRab/YRab;GFP-IR";11;1;0;0;2;1;;;;;;;;
Rab40;btl-gal4,UAS-dsRed, UAS-GFPIR;"YRab/YRab;GFP-IR";12;1;1;3;0;0;;;;;;;;
Rab40;btl-gal4,UAS-dsRed, UAS-GFPIR;"YRab/YRab;GFP-IR";13;0;0;2;2;1;;;;;;;;
Rab40;btl-gal4,UAS-dsRed, UAS-GFPIR;"YRab/YRab;GFP-IR";14;2;0;0;2;0;;;;;;;;
RabX1;btl-gal4,UAS-dsRed, UAS-GFPIR;"YRab/YRab;gal4";1;2;0;1;0;0;;;;;;;;
RabX1;btl-gal4,UAS-dsRed, UAS-GFPIR;"YRab/YRab;gal4";2;1;0;0;1;1;;;;;;;;
RabX1;btl-gal4,UAS-dsRed, UAS-GFPIR;"YRab/YRab;gal4";3;0;0;0;0;0;;;;;;;;
RabX1;btl-gal4,UAS-dsRed, UAS-GFPIR;"YRab/YRab;gal4";4;2;1;0;1;0;;;;;;;;
RabX1;btl-gal4,UAS-dsRed, UAS-GFPIR;"YRab/YRab;gal4";5;0;0;0;0;0;;;;;;;;
RabX1;btl-gal4,UAS-dsRed, UAS-GFPIR;"YRab/YRab;gal4";6;0;0;0;0;0;;;;;;;;
RabX1;btl-gal4,UAS-dsRed, UAS-GFPIR;"YRab/YRab;gal4";7;2;1;0;1;0;;;;;;;;
RabX1;btl-gal4,UAS-dsRed, UAS-GFPIR;"YRab/YRab;gal4";8;0;1;1;1;0;;;;;;;;
RabX1;btl-gal4,UAS-dsRed, UAS-GFPIR;"YRab/YRab;gal4";9;4;2;0;1;1;;;;;;;;
RabX1;btl-gal4,UAS-dsRed, UAS-GFPIR;"YRab/YRab;gal4";10;0;0;0;0;0;;;;;;;;
RabX1;btl-gal4,UAS-dsRed, UAS-GFPIR;"YRab/YRab;gal4";11;1;0;1;1;0;;;;;;;;
RabX1;btl-gal4,UAS-dsRed, UAS-GFPIR;"YRab/YRab;GFP-IR";1;6;2;0;1;0;;;;;;;;
RabX1;btl-gal4,UAS-dsRed, UAS-GFPIR;"YRab/YRab;GFP-IR";2;2;0;0;0;0;;;;;;;;
RabX1;btl-gal4,UAS-dsRed, UAS-GFPIR;"YRab/YRab;GFP-IR";3;6;0;0;3;0;;;;;;;;
RabX1;btl-gal4,UAS-dsRed, UAS-GFPIR;"YRab/YRab;GFP-IR";4;3;2;1;0;0;;;;;;;;
RabX1;btl-gal4,UAS-dsRed, UAS-GFPIR;"YRab/YRab;GFP-IR";5;1;0;0;0;0;;;;;;;;
RabX4;btl-gal4,UAS-dsRed, UAS-GFPIR;"YRab/+;gal4";1;3;1;0;2;1;;;;;;;;
RabX4;btl-gal4,UAS-dsRed, UAS-GFPIR;"YRab/+;gal4";2;1;0;0;2;1;;;;;;;;
RabX4;btl-gal4,UAS-dsRed, UAS-GFPIR;"YRab/+;gal4";3;0;0;0;0;0;;;;;;;;
RabX4;btl-gal4,UAS-dsRed, UAS-GFPIR;"YRab/+;gal4";4;1;1;1;2;0;;;;;;;;
RabX4;btl-gal4,UAS-dsRed, UAS-GFPIR;"YRab/+;gal4";5;1;0;1;0;0;;;;;;;;
RabX4;btl-gal4,UAS-dsRed, UAS-GFPIR;"YRab/+;gal4";6;0;0;1;0;0;;;;;;;;
RabX4;btl-gal4,UAS-dsRed, UAS-GFPIR;"YRab/+;gal4";7;0;0;0;0;0;;;;;;;;
RabX4;btl-gal4,UAS-dsRed, UAS-GFPIR;"YRab/+;gal4";8;0;0;0;0;0;;;;;;;;
RabX4;btl-gal4,UAS-dsRed, UAS-GFPIR;"YRab/+;gal4";9;0;0;2;1;1;;;;;;;;
RabX4;btl-gal4,UAS-dsRed, UAS-GFPIR;"YRab/+;GFP-IR";1;2;1;1;0;0;;;;;;;;
RabX4;btl-gal4,UAS-dsRed, UAS-GFPIR;"YRab/+;GFP-IR";2;0;0;1;2;1;;;;;;;;
RabX4;btl-gal4,UAS-dsRed, UAS-GFPIR;"YRab/+;GFP-IR";3;0;0;1;1;0;;;;;;;;
RabX4;btl-gal4,UAS-dsRed, UAS-GFPIR;"YRab/+;GFP-IR";4;0;0;1;2;0;;;;;;;;
RabX4;btl-gal4,UAS-dsRed, UAS-GFPIR;"YRab/+;GFP-IR";5;1;0;0;1;0;;;;;;;;
RabX4;btl-gal4,UAS-dsRed, UAS-GFPIR;"YRab/+;GFP-IR";6;0;0;1;1;0;;;;;;;;
RabX4;btl-gal4,UAS-dsRed, UAS-GFPIR;"YRab/+;GFP-IR";7;0;0;0;2;0;;;;;;;;
RabX4;btl-gal4,UAS-dsRed, UAS-GFPIR;"YRab/+;GFP-IR";8;1;0;1;1;0;;;;;;;;
RabX5;btl-gal4,UAS-dsRed, UAS-GFPIR;"YRab/+;gal4";1;0;0;4;3;2;;;;;;;;
RabX5;btl-gal4,UAS-dsRed, UAS-GFPIR;"YRab/+;gal4";2;0;0;1;0;0;;;;;;;;
RabX5;btl-gal4,UAS-dsRed, UAS-GFPIR;"YRab/+;gal4";3;0;0;2;1;0;;;;;;;;
RabX5;btl-gal4,UAS-dsRed, UAS-GFPIR;"YRab/+;gal4";4;2;0;3;2;0;;;;;;;;
RabX5;btl-gal4,UAS-dsRed, UAS-GFPIR;"YRab/+;gal4";5;1;1;1;0;0;;;;;;;;
RabX5;btl-gal4,UAS-dsRed, UAS-GFPIR;"YRab/+;gal4";6;3;2;2;0;0;;;;;;;;
RabX5;btl-gal4,UAS-dsRed, UAS-GFPIR;"YRab/+;gal4";7;0;0;0;1;0;;;;;;;;
RabX5;btl-gal4,UAS-dsRed, UAS-GFPIR;"YRab/+;gal4";8;0;0;0;1;2;;;;;;;;
RabX5;btl-gal4,UAS-dsRed, UAS-GFPIR;"YRab/+;gal4";9;2;0;1;0;0;;;;;;;;
RabX5;btl-gal4,UAS-dsRed, UAS-GFPIR;"YRab/+;gal4";10;0;0;0;0;0;;;;;;;;
RabX6;btl-gal4,UAS-dsRed, UAS-GFPIR;"YRab/YRab;GFP-IR";1;6;3;0;0;0;;;;;;;;
RabX6;btl-gal4,UAS-dsRed, UAS-GFPIR;"YRab/YRab;GFP-IR";2;2;1;2;0;0;;;;;;;;
RabX6;btl-gal4,UAS-dsRed, UAS-GFPIR;"YRab/YRab;GFP-IR";3;0;0;1;0;0;;;;;;;;
RabX6;btl-gal4,UAS-dsRed, UAS-GFPIR;"YRab/YRab;GFP-IR";4;1;0;0;2;1;;;;;;;;
RabX6;btl-gal4,UAS-dsRed, UAS-GFPIR;"YRab/YRab;GFP-IR";5;0;0;1;2;1;;;;;;;;
RabX6;btl-gal4,UAS-dsRed, UAS-GFPIR;"YRab/YRab;GFP-IR";6;2;0;0;1;1;;;;;;;;
RabX6;btl-gal4,UAS-dsRed, UAS-GFPIR;"YRab/YRab;GFP-IR";7;2;3;2;2;0;;;;;;;;
RabX6;btl-gal4,UAS-dsRed, UAS-GFPIR;"YRab/YRab;GFP-IR";8;5;0;0;0;0;;;;;;;;
RabX6;btl-gal4,UAS-dsRed, UAS-GFPIR;"YRab/YRab;GFP-IR";9;1;0;0;0;0;;;;;;;;
RabX6;btl-gal4,UAS-dsRed, UAS-GFPIR;"YRab/YRab;GFP-IR";10;0;0;0;0;0;;;;;;;;
RabX6;btl-gal4,UAS-dsRed, UAS-GFPIR;"YRab/YRab;GFP-IR";11;4;0;0;0;0;;;;;;;;
